# Supplementary material for: Characteristics and clinical outcomes of culture-negative and culture-positive septic shock: a single-center retrospective cohort study
Source: Springer Nature journal article supplement (doi:10.1186/s13054-020-03421-4), 2021-01-06
Supplement: MOESM2 [file 18741730]

**Supplementary Table 1. Frequency of the sub-species of the isolated bacteria**

| Species                                                    | Frequency (%) |
|------------------------------------------------------------|---------------|
| <i>Escherichia coli</i>                                    | 377 (37.3)    |
| <i>Klebsiella</i> species                                  | 200 (19.8)    |
| <i>Klebsiella pneumoniae</i>                               | 172           |
| <i>Klebsiella oxytoca</i>                                  | 26            |
| <i>Klebsiella aerogenes</i>                                | 2             |
| <i>Staphylococcus</i> species                              | 83 (8.2)      |
| <i>Staphylococcus aureus</i>                               | 55            |
| <i>Staphylococcus epidermidis</i>                          | 17            |
| <i>Staphylococcus capitis</i>                              | 7             |
| Other Coagulase-negative <i>Staphylococci</i> <sup>1</sup> | 4             |
| <i>Streptococcus</i> species                               | 63 (6.2)      |
| <i>Streptococcus anginosus</i>                             | 17            |
| <i>Streptococcus pneumoniae</i>                            | 15            |
| <i>Streptococcus agalactiae</i>                            | 11            |
| Other <i>Streptococci</i> <sup>2</sup>                     | 20            |
| <i>Enterococcus</i> species <sup>3</sup>                   | 57 (5.6)      |
| <i>Enterobacter</i> species <sup>4</sup>                   | 53 (5.2)      |
| <i>Pseudomonas aeruginosa</i>                              | 51 (5.0)      |
| <i>Citrobacter freundii</i>                                | 21 (2.1)      |
| <i>Acinetobacter baumannii</i>                             | 20 (2.0)      |
| <i>Clostridium</i>                                         | 14 (1.4)      |
| Etc. <sup>5</sup>                                          | 71 (7.0)      |

Data are presented as n (%).

<sup>1</sup>Other Coagulase-negative *Staphylococci* included *Stap. haemolyticus*, *Stap. lugdunensis*, *Stap. saccharolyticus*.

<sup>2</sup>Other *Streptococci* included *Strep. constellatus*, *Strep. dysgalactiae*, *Strep. pyogenes*.

<sup>3</sup>*Enterococcus* species contained *E. faecium*, *E. faecalis*, *E. casseliflavus*, *E. gallinarum*, *E. raffinosus*.

<sup>4</sup>*Enterobacter* species contained *E. faecium*, *E. cloacae*, *E. aerogenes*, *E. avium*, *E. kobei*, *E. sakazakii*.

<sup>5</sup>Et cetera included *Bacillus* species, *Bacteroides* species, *Campylobacter* species, *Chryseobacterium indologenes*, *Eggerthella lenta*, *Flayonifractor plautii*, *Fusobacterium* species, *Haemophilus influenzae*, *Kocuria* species, *Morganella morganii*, *Peptostreptococcus* species, *Proteus mirabilis*, *Vibrio vulnificus*.
