# Supplementary material for: Characteristics and clinical outcomes of culture-negative and culture-positive septic shock: a single-center retrospective cohort study
Source: Springer Nature journal article supplement (doi:10.1186/s13054-020-03421-4), 2021-01-06
Supplement: MOESM3 [file 18741730]

**Supplementary Table 2. Baseline characteristics of septic shock according to the culture results**

| Characteristics                   | Total<br>(N = 1,718) | Not required MV<br>(N = 1,307) | Required MV<br>(N = 411) | <i>P</i> |
|-----------------------------------|----------------------|--------------------------------|--------------------------|----------|
| Age                               | 66.0 (58.0 – 74.0)   | 66.0 (59.0 – 76.0)             | 67.0 (59.0 – 75.0)       | < 0.01   |
| Male                              | 1,035 (60.2)         | 769 (58.8)                     | 266 (64.7)               | 0.03     |
| Past illness                      |                      |                                |                          |          |
| HTN                               | 605 (35.2)           | 457 (35.0)                     | 148 (36.0)               | 0.70     |
| DM                                | 425 (24.7)           | 318 (24.3)                     | 107 (26.0)               | 0.49     |
| CAD                               | 182 (10.6)           | 120 (9.2)                      | 62 (15.1)                | < 0.01   |
| Pulmonary disease                 | 108 (6.3)            | 76 (5.8)                       | 32 (7.8)                 | 0.15     |
| Malignancy                        | 782 (45.5)           | 631 (48.3)                     | 151 (36.7)               | < 0.01   |
| Hematologic disorder              | 118 (6.9)            | 79 (6.0)                       | 39 (9.5)                 | 0.02     |
| CKD                               | 238 (13.9)           | 150 (11.5)                     | 88 (21.4)                | < 0.01   |
| LC                                | 29 (1.7)             | 20 (1.5)                       | 9 (2.2)                  | 0.37     |
| Sites of infection                |                      |                                |                          |          |
| Unknown                           | 160 (9.3)            | 133 (10.2)                     | 27 (6.6)                 | 0.03     |
| LRT                               | 448 (26.1)           | 232 (17.8)                     | 216 (52.6)               | < 0.01   |
| Urinary tract                     | 256 (14.9)           | 224 (17.1)                     | 32 (7.8)                 | < 0.01   |
| Intra-abdomen                     | 226 (13.2)           | 172 (13.2)                     | 54 (13.1)                | 0.99     |
| Hepato-biliary                    | 537 (31.3)           | 477 (36.5)                     | 60 (14.6)                | < 0.01   |
| Others                            | 61 (3.6)             | 44 (3.4)                       | 17 (4.1)                 | 0.46     |
| Laboratory                        |                      |                                |                          |          |
| WBC ( $\times 10^3/\mu\text{L}$ ) | 9.7 (5.0 – 15.9)     | 11.4 (6.0 – 18.9)              | 10.1 (4.6 – 16.2)        | 0.57     |

|                        |                    |                    |                    |        |
|------------------------|--------------------|--------------------|--------------------|--------|
| Hemoglobin (g/dL)      | 10.7 (9.1 – 12.4)  | 11.0 (9.0 – 12.9)  | 11.3 (9.2 – 13.1)  | < 0.01 |
| PT (INR)               | 1.3 (1.1 – 1.5)    | 1.2 (1.1 – 1.4)    | 1.3 (1.2 – 1.5)    | < 0.01 |
| Lactate (mmol/L)       | 2.9 (1.7 – 5.1)    | 2.9 (1.9 – 4.6)    | 4.9 (2.8 – 7.5)    | < 0.01 |
| BUN (mg/dL)            | 25.0 (17.0 – 38.0) | 27.0 (18.0 – 38.0) | 32.0 (23.0 – 51.0) | < 0.01 |
| Creatinine (mg/dL)     | 1.3 (0.9 – 2.1)    | 1.5 (1.0 – 2.4)    | 1.6 (1.1 – 3.0)    | < 0.01 |
| Albumin (g/dL)         | 2.6 (2.2 – 3.1)    | 2.6 (2.2 – 3.1)    | 2.5 (2.1 – 3.0)    | < 0.01 |
| CRP (mg/dL)            | 11.7 (5.0 – 19.8)  | 13.2 (6.7 – 20.9)  | 14.6 (6.2 – 23.5)  | < 0.01 |
| SOFA score             | 7.0 (5.0 – 10.0)   | 7.0 (5.0 – 10.0)   | 12.0 (9.0 – 15.0)  | < 0.01 |
| Source control         | 653 (38.1)         | 494 (37.8)         | 157 (38.2)         | < 0.01 |
| Antibiotics escalation | 189 (12.5)         | 149 (13.0)         | 40 (11.0)          | 0.32   |
| Culture positivity     | 1,012 (58.9)       | 787 (60.2)         | 225 (54.7)         | 0.04   |

Data are presented as n (%) or mean with standard deviation.

Abbreviations: MV, mechanical ventilator; HTN, hypertension; DM, diabetes mellitus; CAD, coronary artery disease; CKD, chronic kidney disease; LC, liver cirrhosis; WBC, white blood cells; PT, prothrombin time; INR, international normalized ratio; BUN, blood urea nitrogen; CRP, C-reactive protein; SOFA, sequential organ failure assessment.
