# Supplementary material for: Characteristics and clinical outcomes of culture-negative and culture-positive septic shock: a single-center retrospective cohort study
Source: Springer Nature journal article supplement (doi:10.1186/s13054-020-03421-4), 2021-01-06
Supplement: MOESM4 [file 18741730]

**Supplementary Table 3. Univariate and multivariate analysis for predicting mechanical ventilator requirement**

|               | Univariate |           |          | Multivariate |           |          |
|---------------|------------|-----------|----------|--------------|-----------|----------|
|               | OR         | 95% CI    | <i>p</i> | Adjusted OR  | 95% CI    | <i>p</i> |
| Male          | 1.28       | 1.02–1.61 | 0.03     |              |           |          |
| CAD           | 1.76       | 1.27–2.44 | < 0.01   |              |           |          |
| CKD           | 2.10       | 1.57–2.81 | < 0.01   |              |           |          |
| Malignancy    | 1.63       | 1.09–2.43 | 0.02     |              |           |          |
| Unknown       | 0.62       | 0.40–0.95 | 0.95     |              |           |          |
| LRT infection | 5.13       | 4.04–6.53 | < 0.01   | 5.14         | 2.86–9.23 | < 0.01   |
| UT infection  | 0.41       | 0.28–0.60 | < 0.01   | 0.34         | 0.15–0.75 | < 0.01   |
| HBP infection | 0.30       | 0.22–0.40 | < 0.01   | 0.28         | 0.16–0.48 | < 0.01   |
| CPSS          | 0.80       | 0.64–0.99 | 0.05     |              |           |          |
| Age           | 1.02       | 1.00–1.03 | 0.02     |              |           |          |
| Hemoglobin    | 1.17       | 1.09–1.26 | < 0.01   |              |           |          |
| BUN           | 1.01       | 1.00–1.02 | < 0.01   |              |           |          |
| Creatinine    | 1.01       | 0.93–1.10 | 0.76     |              |           |          |
| Albumin       | 1.02       | 0.91–1.16 | 0.69     | 1.23         | 0.87–1.73 | 0.25     |
| Lactate       | 1.20       | 1.13–1.26 | < 0.01   | 1.17         | 1.09–1.26 | < 0.01   |
| SOFA score    | 1.41       | 1.33–1.49 | < 0.01   | 1.31         | 1.22–1.42 | < 0.01   |

Abbreviations: OR = odds ratio; CI = confidence interval; CAD = coronary artery disease; CKD = chronic kidney disease; LRT = lower respiratory tract; UT = urinary tract; HBP = hepatobiliary-pancreas; CPSS = culture-positive septic shock; BUN = blood urine nitrogen; SOFA = sequential organ failure assessment.
