# Supplementary material for: Characteristics and clinical outcomes of culture-negative and culture-positive septic shock: a single-center retrospective cohort study
Source: Springer Nature journal article supplement (doi:10.1186/s13054-020-03421-4), 2021-01-06
Supplement: MOESM5 [file 18741730]

**Supplementary Table 4. In-hospital mortality according to sites of infection among patients with culture-negative septic shock**

| Site of infection      | Total<br>(N = 706) | Survival<br>(N = 590) | In-hospital death<br>(N = 116) | <i>P</i> |
|------------------------|--------------------|-----------------------|--------------------------------|----------|
| Unknown                | 103 (14.6)         | 87 (14.7)             | 16 (13.8)                      | 0.79     |
| Low respiratory tract  | 269 (38.1)         | 199 (33.7)            | 70 (60.3)                      | < 0.01   |
| Urinary tract          | 50 (7.1)           | 46 (7.8)              | 4 (3.4)                        | 0.10     |
| Gastro-intestinal      | 130 (18.4)         | 112 (19.0)            | 18 (15.5)                      | 0.38     |
| Hepatobiliary-pancreas | 137 (19.4)         | 125 (21.2)            | 12 (10.3)                      | < 0.01   |

Data are presented as n (%).
